# Supplementary material
Source: publisher site journal article supplement (https://www.spandidos-publications.com/4519/downloadSupplementary)
Supplement: Supplementary file 1 [file downloadSupplementary]

Table SI. Sequence of primers for cloning.

| Gene          | Strand  | Restriction enzyme | Sequence <sup>a</sup> (5' to 3')             |
|---------------|---------|--------------------|----------------------------------------------|
| <i>MOSPD1</i> |         |                    |                                              |
| 5'-flanking   | Forward | <i>Xho</i> I       | CCG <u>CTCGAG</u> GGGAGAGCAGAACACAAAGG       |
|               | Reverse | <i>Bgl</i> II      | GGA <u>AAGATCT</u> TCCAAACCCAGTCTTCTTGG      |
| 3'-flanking   | Forward | <i>Xho</i> I       | CCG <u>CTCGAG</u> AGTAGTCAGAGACCTGGGGTTT     |
|               | Reverse | <i>Bgl</i> II      | GGA <u>AAGATCT</u> GATTTTCGCATTGTTTTCTCTACCC |

<sup>a</sup>Restriction enzyme sites are underlined. MOSPD1, motile sperm domain containing 1.

Table SII. Sequence of primers for mutagenesis.

| Mutated region | Strand  | Restriction enzyme | Sequence (5' to 3')              |
|----------------|---------|--------------------|----------------------------------|
| TBE1           | Forward | <i>XhoI</i>        | AGTTACCACATCAGCGACCCTTTAAGTAAG   |
|                | Reverse | <i>BglIII</i>      | CTTACTTAAAGGGTCGCTGATGTGGTAACTGG |
| TBE2           | Forward | <i>XhoI</i>        | TAGTCAACAAGATCAGCGTGACACCTGCCATG |
|                | Reverse | <i>BglIII</i>      | CATGGCAGGTGTCACGCTGATCTTGTTGACTA |
| TBE3           | Forward | <i>XhoI</i>        | ACTGGGTCCAGTTCAGCGAAGATGATGGTGAG |
|                | Reverse | <i>BglIII</i>      | CTCACCATCATCTTCGCTGAACTGGACCCAGT |

TBE, TCF-binding element.

Table SIII. Sequence of primers for ChIP-qPCR.

| Gene             | Strand  | Sequence (5' to 3')         |
|------------------|---------|-----------------------------|
| <i>MOSPD1</i>    | Forward | GGACATTCCTCACCATCATC        |
|                  | Reverse | ACAAGATCAAAGTGACACCTG       |
| <i>RNF43</i>     | Forward | TCAACTCTCTGGATAAGGTGGAATAGC |
|                  | Reverse | GACTTTTGGGGTGGGTGGGAAATA    |
| Negative control | Forward | AGCTCAGGCCTCAAGACCTT        |
|                  | Reverse | AAGAAGATGCGGCTGACTGT        |

ChIP, chromatin immunoprecipitation; MOSPD1, motile sperm domain containing 1; RNF43: ring finger protein 43.

Table SIV. Sequence of primers for 3C assay.

| PCR        | Region   | Sequence (5' to 3')       |
|------------|----------|---------------------------|
| 1st PCR    | Promoter |                           |
|            | 5'       | ACCATCCTGGCTAACAGTG       |
|            | 3'       | CAAGAAATTGTCAGTCTCACTG    |
|            | Enhancer |                           |
|            | 5'       | TAGAGAGGCACCAGCGATTC      |
|            | 3'       | GGGTAAATAGATAAGACCTTAAGAG |
| Nested PCR | Promoter |                           |
|            | 5'       | CACCTGGAGTCCCAGCTAC       |
|            | 3'       | CACACCAACCAAACCTCAAAGAT   |
|            | Enhancer |                           |
|            | 5'       | CAGTTAGTAAACTAGGTCCTGAG   |
|            | 3'       | GAATGTTTTTCTAAACACTGAAGAA |

3C, chromatin conformation capture.

Table SV. The clinical and histological information of the 11 CRC cases.

| Case  | Age, | Sex | Location         | Histological classification              |
|-------|------|-----|------------------|------------------------------------------|
| CRC1  | 40   | F   | Rectum           | Well differentiated adenocarcinoma       |
| CRC2  | 74   | M   | Ascending colon  | Moderately differentiated adenocarcinoma |
| CRC3  | 56   | M   | Sigmoid colon    | Moderately differentiated adenocarcinoma |
| CRC4  | 39   | M   | Sigmoid colon    | Moderately differentiated adenocarcinoma |
| CRC5  | 74   | M   | Sigmoid colon    | Moderately differentiated adenocarcinoma |
| CRC6  | 59   | M   | Ascending colon  | Mucinous adenocarcinoma                  |
| CRC7  | 43   | M   | Sigmoid colon    | Well differentiated adenocarcinoma       |
| CRC8  | 78   | M   | Transverse colon | Well differentiated adenocarcinoma       |
| CRC9  | 36   | F   | Rectum           | Moderately differentiated adenocarcinoma |
| CRC10 | 51   | F   | Sigmoid colon    | Moderately differentiated adenocarcinoma |
| CRC11 | 49   | M   | Rectum           | Moderately differentiated adenocarcinoma |

CRC, colorectal cancer.

Table SVI. TCF7L2-binding motifs in the 3'-flanking region of *MOSPD1*.

| JASPAR score | Strand | Sequence (5' to 3') | Name of motif |
|--------------|--------|---------------------|---------------|
| 14.737       | -      | CAAGATCAAAGTGA      | TBE2          |
| 14.153       | -      | CCACATCAAAGACC      | TBE1          |
| 13.362       | -      | CCAGTTCAAAGAAG      | TBE3          |
| 7.626        | -      | GAATAACAAAGAGT      | -             |
| 5.934        | -      | AGAGAACAAAAATG      | -             |
| 4.817        | +      | GCAAATCACAGAAA      | -             |
| 4.808        | +      | AATGAACAAAATAA      | -             |
| 4.212        | -      | GTTAATCAAAAAGAT     | -             |

TCF7L2, transcription factor 7 like 2; MOSPD1, motile sperm domain containing 1; TBE, TCF-binding element.
